# Supplementary material for: Morphofunctional changes in the immune system in colitis-associated colorectal cancer in tolerant and susceptible to hypoxia mice
Source: PeerJ. 2025 Feb 25;13:e19024. doi: 10.7717/peerj.19024 (PMC11869898; doi:10.7717/peerj.19024)
Supplement: Supplemental Information 3 [file peerj-13-19024-s003.xlsx]

## Sheet: Figure 1
		Number	Group	Presence of tumor	Tumor area, mm2
		1	Tolerant	GIN	0.441737
		2	Tolerant	GIN	0.21457
		3	Tolerant	No tumor
		4	Tolerant	No tumor
		5	Tolerant	GIN	0.0607199
		6	Tolerant	No tumor
		7	Tolerant	No tumor
		8	Tolerant	AC	2.0136
		9	Tolerant	No tumor
		10	Tolerant	No tumor
		11	Tolerant	GIN	0.0297414
		12	Tolerant	No tumor
		1	Susceptible	AC	3.91792
		2	Susceptible	AC	3.92354
		3	Susceptible	AC	1.86534
		4	Susceptible	AC	3.85248
		5	Susceptible	AC	2.00356
		6	Susceptible	No tumor
		7	Susceptible	No tumor
		8	Susceptible	AC	3.87452
		9	Susceptible	AC	3.91874
		10	Susceptible	AC	3.90617
		11	Susceptible	AC	2.89547
		12	Susceptible	AC	2.32564
		13	Susceptible	AC	3.76984

## Sheet: Figure 3
	Group	Subgroup	Thymus cortex	Thymus medulla	Thymus cortex to medulla ratio
	Tolerant	Control	50.83	49.17	1.03376
	Tolerant	Control	56.62	43.38	1.30521
	Tolerant	Control	55.33	44.67	1.23864
	Tolerant	Control	54.06	45.94	1.17675
	Tolerant	Control	51.11	48.89	1.04541
	Tolerant	CAC	73.9	26.1	2.83142
	Tolerant	CAC	68.16	31.84	2.1407
	Tolerant	CAC	64.96	35.04	1.85388
	Tolerant	CAC	71.42	28.58	2.49895
	Tolerant	CAC	66.97	33.03	2.02755
	Susceptible	Control	64.92	35.08	1.85063
	Susceptible	Control	55.24	44.76	1.23414
	Susceptible	Control	61.32	38.68	1.58532
	Susceptible	Control	60.57	39.43	1.53614
	Susceptible	Control	53.02	46.98	1.12857
	Susceptible	CAC	48.8	51.2	0.953125
	Susceptible	CAC	55.54	44.46	1.24921
	Susceptible	CAC	54.7	45.3	1.20751
	Susceptible	CAC	58.13	41.87	1.38834
	Susceptible	CAC	50.56	49.44	1.02265
	Susceptible	CAC	54.76	45.24	1.21043
	Susceptible	CAC	67.9	32.1	2.11526
	Susceptible	CAC	55.03	44.97	1.2237
	Susceptible	CAC	54.61	45.39	1.20313
	Susceptible	CAC	58.3	41.7	1.39808
	Susceptible	CAC	51.23	48.77	1.05044

## Sheet: Table 1
	Group	Subgroup	Thymic bodies in the form of 3-5 cell clusters, %	Thymic bodies in the form of clusters containing more than 5 cells, %	Thymic bodies with keratinization, %	Thymic bodies in the form of cyst-like cavities, %
	Tolerant	Control	28.57	38.7	26.35	6.38
	Tolerant	Control	70	0	20	10
	Tolerant	Control	57.89	21.05	10.53	10.53
	Tolerant	Control	55.56	5.56	16.67	22.21
	Tolerant	Control	70	10	10	10
	Tolerant	CAC	60	9.45	8.33	22.22
	Tolerant	CAC	41.54	5.68	11.11	41.67
	Tolerant	CAC	45.31	4.52	7.31	42.86
	Tolerant	CAC	24.4	8.46	10	57.14
	Tolerant	CAC	34.86	7.38	11.67	46.09
	Susceptible	Control	60	10	20	10
	Susceptible	Control	41.67	16.67	8.33	33.33
	Susceptible	Control	50.84	13.31	9.67	26.18
	Susceptible	Control	57.6	9.97	15	17.43
	Susceptible	Control	46.31	17.02	18.67	18
	Susceptible	CAC	57.14	28.57	7.14	7.15
	Susceptible	CAC	68.42	21.05	10.53	0
	Susceptible	CAC	60.48	21.14	15.26	3.12
	Susceptible	CAC	52.63	5.26	5.26	36.85
	Susceptible	CAC	66.67	8.33	16.67	8.33
	Susceptible	CAC	25	12.5	25	37.5
	Susceptible	CAC	83.33	0	16.67	0
	Susceptible	CAC	63.21	9.65	23.13	4.01
	Susceptible	CAC	57.84	23.12	13.89	5.15
	Susceptible	CAC	39.54	13.76	15.23	31.47
	Susceptible	CAC	73.62	16.38	8.64	1.36

## Sheet: Figure 5
	Group	Subgroup	White pulp to red pulp ratio	Lymphoid follicles, %	PALS, %	Germinal centers, %	Marginal zone, %
	Tolerant	Control	0.798561	26.2	73.8	8.6	46.27
	Tolerant	Control	0.644737	24.65	75.35	6.52	52.98
	Tolerant	Control	0.650165	22.76	77.24	7.81	47.65
	Tolerant	Control	0.533742	28.75	71.25	6.64	49.19
	Tolerant	Control	0.689189	16.31	83.69	7.76	45.19
	Tolerant	CAC	0.515152	29.58	70.42	10.06	50.93
	Tolerant	CAC	0.618123	36.09	63.91	6.96	50.03
	Tolerant	CAC	0.546392	29.45	70.55	10.79	46.63
	Tolerant	CAC	0.544402	32.3	67.7	10.56	49.21
	Tolerant	CAC	0.650165	28.52	71.48	8.01	49.98
	Susceptible	Control	0.655629	16.23	83.77	7.02	46.21
	Susceptible	Control	0.930502	4.43	95.57	4.94	41.61
	Susceptible	Control	0.810237	10.33	89.67	3.26	43.91
	Susceptible	Control	0.682364	6.41	93.59	8.19	40.89
	Susceptible	Control	0.908655	14.74	85.26	5.31	48.03
	Susceptible	CAC	1.18579	28.65	71.35	11.88	41.35
	Susceptible	CAC	0.294498	43.43	56.57	10.31	47.64
	Susceptible	CAC	0.440922	30.54	69.46	11.38	49.34
	Susceptible	CAC	0.650165	41	59	12.08	43.15
	Susceptible	CAC	0.529052	30.3	69.7	8.69	54.61
	Susceptible	CAC	0.618123	31.58	68.42	10.77	55.27
	Susceptible	CAC	0.694587	31.24	68.76	9.94	48.86
	Susceptible	CAC	0.710327	36.73	63.27	11.56	52.17
	Susceptible	CAC	0.692155	29.02	70.98	10.84	44.35
	Susceptible	CAC	0.585632	33.29	66.71	11.32	42.28
	Susceptible	CAC	0.640322	40.08	59.92	9.25	50.64

## Sheet: Table 2
	Group	Subgroup	Lymphocytes		Т-helper cells (CD4+)		Cytotoxic Т-lymphocytes (CD8+)		Regulatory Т-cells (CD4+CD25+Foxp3+)		NK (NK1.1+)		В-lymphocytes (CD19+)		Monocytes (CD11b+)
			×106/ml	%	×106/ml	%	×106/ml	%	×106/ml	%	×106/ml	%	×106/ml	%	×106/ml	%
	Tolerant	Control	4.4	66.5	0.9386	24.7	0.03002	0.79	0.087787	36	2.1775	33.5	0.28196	7.42	0.2496	3.84
	Tolerant	Control	5.1	67	3.6261	45.9	1.3983	17.7	0.04088	42.7	2.2644	20.4	0.8216	10.4	0.26751	2.41
	Tolerant	Control	4.2	69.7	2.1912	66.4	0.29469	8.93	0.006515	22.7	1.08	20	0.18579	5.63	0.09828	1.82
	Tolerant	Control	3.8	62.2	2.178	44.8	1.4592	19.2	0.04167	36.5	2.18	21.2	1.1856	15.6	0.25	2.4
	Tolerant	Control	7.6	63.4	3.224	46.1	1.7963	14.06	0.05123	41.3	1.9275	22.3	0.56213	10.23	0.19846	2.73
	Tolerant	CAC	9.1	49.4	2.4479	26.9	1.1284	12.4	0.000715	1.35	0.59658	33.5	1.7472	19.2	5.3619	29.3
	Tolerant	CAC	1.6	50.2	0.12544	7.84	0.1008	6.3	0.001196	5.95	0.1984	20.4	0.12368	7.73	2	25
	Tolerant	CAC	8.6	65.8	1.677	19.5	0.9804	11.4	0	0	0.17204	20	2.881	33.5	0.28764	4.23
	Tolerant	CAC	4.4	54.3	0.5632	12.8	0.3586	8.15	0.000984	1.4	0.199	21.2	0.7128	16.2	2.10005	24.9
	Tolerant	CAC	4.5	65.8	0.2214	4.92	0.33795	7.51	0.001075	15.18	0.6954	22.3	0.42525	9.45	3.6523	23.18
	Susceptible	Control	6.9	73.9	3.0464	23.8	1.3184	10.3	0.059841	42.4	3.597	21.8	0.96384	7.53	0.29535	1.79
	Susceptible	Control	12.8	77.3	5.7486	42.9	2.0904	15.6	0.062179	37.1	4.48191	26.21	1.32124	9.86	0.43776	2.56
	Susceptible	Control	13.4	78.2	7.6875	62.5	1.14636	9.32	0.032271	28.46	3.1941	18.9	0.74046	6.02	0.32786	1.94
	Susceptible	Control	12.3	72.6	5.75	40.5	1.30584	9.85	0.06	37	3.6	22	0.96547	7.45	0.33	1.95
	Susceptible	Control	7.5	74.9	3.216	41.4	1.2984	11.23	0.049254	27.8	3.49651	15.3	0.8429	8.61	0.4641	1.87
	Susceptible	CAC	6.8	63.3	1.258	18.5	1.8156	26.7	0.002167	28.6	2.8728	26.6	2.0604	30.3	2.596	20.9
	Susceptible	CAC	7.4	67.3	1.4948	20.2	1.4282	19.3	0.000308	1.06	1.0142	9.22	1.702	23	1.7871	23.6
	Susceptible	CAC	8.1	72.4	1.3365	16.5	2.3652	29.2	0.000983	1.85	0.6105	5.5	2.7378	33.8	0.2496	16.1
	Susceptible	CAC	5	62.1	0.91	18.2	1.255	25.1	0.005026	29.3	0.4744	5.93	1.54	30.8	0.3954	3.12
	Susceptible	CAC	7	65.1	1.286	15.8	1.363	18.9	0.000432	15.07	0.4587	3.89	1.6892	25.94	0.9857	10.94
	Susceptible	CAC	7.6	66.8	1.1234	21.3	1.9357	31.2	0.000561	12.11	0.4439	15.37	2.0314	23.61	1.3652	22.52
	Susceptible	CAC	6.9	71.1	1.4125	15.7	1.5482	28.7	0.00394	25.3	0.9871	14.92	1.98745	20.96	0.5216	20.11
	Susceptible	CAC	7.1	62.4	0.9876	14.9	1.6893	20.5	0.00287	34.8	1.2632	10.03	1.57621	29.85	2.2572	19.37
	Susceptible	CAC	8	64.9	1.4568	19.4	1.489	21.8	0.001138	3.71	1.898	8.24	1.8745	32.26	1.0035	12.84
	Susceptible	CAC	6.7	63.5	1.3324	16.7	1.5032	24.3	0.000919	29.5	0.5003	21.2	2.53497	30.87	0.4134	18.88
	Susceptible	CAC	8.3	70.2	1.291	17.1	2.1113	22.6	0.001006	31.6	0.3897	20.85	1.6774	21.63	0.4008	13.69

## Sheet: Table 3
	Group	Subgroup	Т-helper cells (CD4+)		Cytotoxic Т-lymphocytes (CD8+)		Regulatory Т-cells (CD4+CD25+Foxp3+)		NK (NK1.1+)		В-lymphocytes (CD19+)		Macrophages (F4/80+)
			×106/ml	%	×106/ml	%	×106/ml	%	×106/ml	%	×106/ml	%	×106/ml	%
	Tolerant	Control	1.7808	11.2	0.0159	0.1	0	0	0.0477	0.3	0.0318	0.2	0.477	3
	Tolerant	Control	1.272	10.6	0	0	0	0	0.024	0.2	0.012	0.1	0.744	6.2
	Tolerant	Control	1.39536	15.2	0.00918	0.1	0	0	0.01836	0.2	0.0459	0.5	0.07344	0.8
	Tolerant	Control	8.66617	91.9	0.01886	0.2	0.0293084	0.4	0.01886	0.2	2.01802	21.4	1.92372	20.4
	Tolerant	Control	1.9541	14.8	0.01254	0.1	0	0	0.02096	0.2	0.05726	0.6	0.62947	5.1
	Tolerant	CAC	3.6542	24.2	0.0151	0.1	0	0	0.0228	0.3	0.1359	0.9	0.1596	2.1
	Tolerant	CAC	0.5472	7.2	0.0152	0.2	0.005548	0.2	0.104	0.8	0.0076	0.1	0.533	4.1
	Tolerant	CAC	2.444	18.8	0.052	0.4	0.018642	0.2	0.02946	0.3	0.052	0.4	0.70704	7.2
	Tolerant	CAC	1.48282	15.1	0.00982	0.1	0.00334862	0.1	0.03	0.3	0.00982	0.1	0.5268	4.1
	Tolerant	CAC	2.0034	17.3	0.01494	0.3	0.001265	0.1	0.0283	0.2	0.0344	0.2	0.48361	3.9
	Susceptible	Control	1.2411	12.6	0.00985	0.1	0	0	0.0197	0.2	0.02955	0.3	0.58115	5.9
	Susceptible	Control	0.97293	11.3	0	0	0	0	0.02583	0.3	0.00861	0.1	0.62853	7.3
	Susceptible	Control	1.10484	10.8	0.01023	0.1	0	0	0.02046	0.2	0.04092	0.4	0.8184	8
	Susceptible	Control	1.15	15	0.0099	0.1	0	0	0.021	0.2	0.0312	0.3	0.63131	7.3
	Susceptible	Control	1.1264	7.6	0.00886	0.2	0	0	0.0237	0.3	0.03561	0.2	0.70126	6.9
	Susceptible	CAC	0.7326	6.6	0.0111	0.1	0	0	0.1332	1.2	0.1443	1.3	0.1665	1.5
	Susceptible	CAC	4.344	24	0.0181	0.1	0.008688	0.1	0.1267	0.7	1.1222	6.2	0.7964	4.4
	Susceptible	CAC	1.4892	14.6	0.0408	0.4	0.0055284	0.1	0.1632	1.6	0.2346	2.3	0.3978	3.9
	Susceptible	CAC	1.485	14.6	0.018	0.1	0.00553	0.1	0.133	1.25	0.25	2.3	0.398	3.8
	Susceptible	CAC	1.3695	15.8	0.0341	0.2	0	0	0.138	0.94	0.984	1.5	0.4102	4
	Susceptible	CAC	1.9475	21.2	0.0126	0.3	0.000164	0.1	0.1214	1.06	0.1113	5.4	0.2981	4.2
	Susceptible	CAC	1.5006	19.5	0.0231	0.2	0	0	0.1553	1.11	0.2469	2	0.3336	2.9
	Susceptible	CAC	1.4785	10.9	0.0265	0.1	0	0	0.16	1.24	0.2533	2.1	0.5448	1.8
	Susceptible	CAC	3.856	20.4	0.0199	0.1	0	0	0.1406	0.87	0.3314	3.3	0.6153	2.3
	Susceptible	CAC	0.9471	14.8	0.0182	0.4	0.0001142	0.2	0.1333	1.1	0.242	1.9	0.7068	2.2
	Susceptible	CAC	1.487	18.1	0.0134	0.1	0	0	0.1098	0.85	0.305	2.5	0.5946	2
